# Supplementary material
Source: ML conference proceedings conference paper supplement (https://proceedings.mlr.press/v80/co-reyes18a.html)
Supplement: Supplementary file [file co-reyes18a-supp.pdf]

---

# Supplemental Materials

---

John D. Co-Reyes<sup>\*1</sup> YuXuan Liu<sup>\*1</sup> Abhishek Gupta<sup>\*1</sup> Benjamin Eysenbach<sup>2</sup> Pieter Abbeel<sup>1</sup> Sergey Levine<sup>1</sup>

## 1. Experimental Details

For all experiments, we parameterize  $\pi_{\theta_{PD}}$  and  $\pi_e$  as a three-layer fully connected neural networks with 400, 300, 200 hidden units and ReLU activations. The policies output either categorical or Gaussian distributions. The encoder is a two-layer bidirectional-LSTM with 300 hidden units, and we mean-pool over LSTM outputs over time before applying a linear transform to produce parameters of a Gaussian distribution. We use an 8-dimensional diagonal Gaussian distribution for  $z$ . The state decoder is a single-layer LSTM with 256 hidden units that conditions on the initial state and latent  $z$ , to output a Gaussian distribution over trajectories. We use trajectories of length  $T = 19$ , and plan over  $K = 2048$  random latent sequences. We use horizons  $H = 380$ ,  $H_{MPC} = 5$ ,  $H_e = 5$  for the 2D navigation task,  $H = 950$ ,  $H_{MPC} = 20$ ,  $H_e = 10$  for the wheeled locomotion task, and  $H = 950$ ,  $H_{MPC} = 10$ ,  $H_e = 10$  for the object manipulation task. These values were chosen empirically with a hyperparameter sweep.

and gradient clipping.

## 2. Baseline Details

**TRPO / VIME** We used the rllab TRPO implementation, OpenAI VIME implementation with a batch size of 100 \* task horizon and step size of 0.01.

**MPC** We use a learning rate of 0.001 and batch size of 512. The MPC policy simulates 2048 paths each time it is asked for an action. We verified correctness on half-cheetah.

**Option Critic** We use a version of Option Critic that uses PPO instead of DQN. We swept over number of options, reward multiplier, and entropy bonuses. We verified correctness on cartpole, hopper, and cheetah.

**Feudal / A3C** The Feudal and A3C implementations are based on chainerRL. We swept over the parameters  $\beta$ ,  $t_{max}$ ,

---

<sup>\*</sup>Equal contribution <sup>1</sup>University of California, Berkeley <sup>2</sup>Google Brain. Correspondence to: John D Co-Reyes <jcoreyes@berkeley.edu>, YuXuan Liu <yuxuanliu@berkeley.edu>.
